# Supplementary material
Source: Elsevier journal article supplement (https://www.sciencedirect.com/science/article/pii/S2173572721000709)
Supplement: mmc1 [file S2173572721000709:mmc1.pdf]

## **EPIDEMIOLOGIA Y PRONOSTICO DE LOS PACIENTES CON ANTECEDENTES DE NEOPLASIA INGRESADOS EN UCI. ESTUDIO MULTICÉNTRICO OBSERVACIONAL.**

### **Material electrónico suplementario.**

### **Metodología selección de pacientes base ENVIN y definiciones.**

Se seleccionaron pacientes adultos mayores de 18 años ingresados por más de 24 horas en alguna de las UCI participantes durante los tres meses del registro ENVIN completo del año 2018. En todos los casos se registraron datos demográficos y administrativos al ingreso en la UCI: Edad, sexo, procedencia (unidad de hospitalización, domicilio, otra UCI o institución sociosanitaria), antecedentes de cirugía en los 30 días previos al ingreso, fecha de ingreso en el hospital y fecha de ingreso en UCI. A su ingreso se clasificaron los pacientes de acuerdo con el motivo de ingreso en UCI en: cirugía programada, cirugía urgente y proceso médico no quirúrgico. Se definió cirugía urgente cuando la indicación quirúrgica se realizaba en menos de 24 horas hasta la realización del procedimiento quirúrgico, mientras que cuando no se cumplía esta condición se considera cirugía programada. Cuando el paciente no ingresaba para control post-operatorio inmediato, se consideraba paciente médico.

Según su enfermedad de base, los pacientes fueron clasificados en coronarios, quirúrgicos urgentes, quirúrgicos programados, traumatológicos y médicos. La gravedad de la enfermedad se evaluó mediante las escalas APACHE II y/o SAPS II obtenidas a las 24 horas de ingreso en la Unidad. Se registró el diagnóstico principal (agrupado por aparatos) motivo de ingreso en UCI, incluyendo el ingreso inmediatamente posterior al trasplante de órgano sólido. También se tuvo en cuenta la cirugía en los 30 días previos al ingreso en UCI, aunque el motivo de este fuera por causa médica.

Se registraron las comorbilidades de los pacientes, las instrumentaciones y técnicas a las que fueron sometidos durante su estancia en UCI, días de estancia en UCI y estado clínico al alta de UCI (medida por la mortalidad cruda en UCI). Se evaluaron las siguientes comorbilidades: diabetes, insuficiencia renal, cirrosis, enfermedad pulmonar obstructiva crónica (EPOC), desnutrición (o hipoalbuminemia), trasplante de órgano sólido e inmunodepresión (definida por la administración previa de tratamientos que reducen la resistencia a la infección). Se registró la presencia de neutropenia antes del ingreso en UCI cuando la cifra de neutrófilos era inferior a  $500 /\text{mm}^3$ . Se consideró también la cirugía urgente una vez el paciente estuviera ingresado en UCI.
